# Supplementary material for: Palladium-catalysed carboxytelomerisation of β-myrcene to highly branched C21-esters
Source: Royal Society of Chemistry journal article supplement (doi:10.1039/c8cy00769a), 2018-01-01
Supplement: c8cy00769a1.pdf [file c8cy00769a1.pdf]

Supporting information to the manuscript:

**Palladium-catalysed carboxytelomerisation of  $\beta$ -myrcene to highly branched C<sub>21</sub>-esters**

Dennis Vogelsang<sup>[b]</sup>, Morten Dittmar<sup>[b]</sup>, Thomas Seidensticker<sup>[b]</sup>, Andreas J. Vorholt<sup>[a]\*</sup>

<sup>[a]</sup> Max Planck Institute for Chemical Energy Conversion, Stiftstrasse 34, 45470 Mülheim an der Ruhr (Germany), E-mail: Andreas-j.vorholt@cec.mpg.de

<sup>[b]</sup> Laboratory of Industrial Chemistry, Technical University of Dortmund, Emil-Figge-Straße 66, 44227 Dortmund (Germany),

**Table of contents**

|                 |                                                                                             |                 |
|-----------------|---------------------------------------------------------------------------------------------|-----------------|
| <b><u>1</u></b> | <b><u>GENERAL PROCEDURES</u></b>                                                            | <b><u>1</u></b> |
| 1.1             | GENERAL PROCEDURE FOR THE CARBOXYTELOMERISATION OF $\beta$ -MYRCENE WITH ALCOHOLS           | 1               |
| <b><u>2</u></b> | <b><u>DOE</u></b>                                                                           | <b><u>2</u></b> |
| 2.1             | SETTINGS IN THE DOE                                                                         | 2               |
| 2.2             | RESULTS OF THE DOE                                                                          | 3               |
| <b><u>3</u></b> | <b><u>APPLIED 1,3-DIENES</u></b>                                                            | <b><u>4</u></b> |
| <b><u>4</u></b> | <b><u>CHARACTERISATION DATA OF PRODUCTS</u></b>                                             | <b><u>5</u></b> |
| 4.1.1           | METHYL 4,8-DIMETHYLNONA-3,7-DIENOATE + ISOMERS – 2A                                         | 5               |
| 4.1.2           | METHYL 12-METHYL-8-METHYLENE-3-(4-METHYLPENT-3-EN-1-YL)TRIDECA-3,11-DIENOATE + ISOMERS – 3A | 5               |
| 4.1.3           | ETHYL 12-METHYL-8-METHYLENE-3-(4-METHYLPENT-3-EN-1-YL)TRIDECA-3,11-DIENOATE + ISOMERS – 3B  | 6               |
| 4.1.4           | BUTYL 12-METHYL-8-METHYLENE-3-(4-METHYLPENT-3-EN-1-YL)TRIDECA-3,11-DIENOATE + ISOMERS – 3C  | 6               |

|          |                                                                                                           |          |
|----------|-----------------------------------------------------------------------------------------------------------|----------|
| 4.1.5    | DECYL 12-METHYL-8-METHYLENE-3-(4-METHYLPENT-3-EN-1-YL)TRIDECA-3,11-DIENOATE + ISOMERS – 3D                | 7        |
| 4.1.6    | ISOPROPYL 12-METHYL-8-METHYLENE-3-(4-METHYLPENT-3-EN-1-YL)TRIDECA-3,11-DIENOATE + ISOMERS – 3E            | 7        |
| 4.1.7    | BENZYL 12-METHYL-8-METHYLENE-3-(4-METHYLPENT-3-EN-1-YL)TRIDECA-3,11-DIENOATE + ISOMERS – 3G               | 8        |
| 4.1.8    | 4-(TERT-BUTYL)PHENYL 12-METHYL-8-METHYLENE-3-(4-METHYLPENT-3-EN-1-YL)TRIDECA-3,11-DIENOATE + ISOMERS – 3H | 8        |
| <b>5</b> | <b><u>NMR-SPECTRA.....</u></b>                                                                            | <b>9</b> |
| 5.1.1    | METHYL 4,8-DIMETHYLNONA-3,7-DIENOATE + ISOMERS – 2A                                                       | 9        |
| 5.1.2    | METHYL 12-METHYL-8-METHYLENE-3-(4-METHYLPENT-3-EN-1-YL)TRIDECA-3,11-DIENOATE + ISOMERS – 3A               | 10       |
| 5.1.3    | ETHYL 12-METHYL-8-METHYLENE-3-(4-METHYLPENT-3-EN-1-YL)TRIDECA-3,11-DIENOATE + ISOMERS – 3B                | 11       |
| 5.1.4    | BUTYL 12-METHYL-8-METHYLENE-3-(4-METHYLPENT-3-EN-1-YL)TRIDECA-3,11-DIENOATE + ISOMERS – 3C                | 11       |
| 5.1.5    | DECYL 12-METHYL-8-METHYLENE-3-(4-METHYLPENT-3-EN-1-YL)TRIDECA-3,11-DIENOATE + ISOMERS – 3D                | 12       |
| 5.1.6    | ISOPROPYL 12-METHYL-8-METHYLENE-3-(4-METHYLPENT-3-EN-1-YL)TRIDECA-3,11-DIENOATE + ISOMERS – 3E            | 13       |
| 5.1.7    | BENZYL 12-METHYL-8-METHYLENE-3-(4-METHYLPENT-3-EN-1-YL)TRIDECA-3,11-DIENOATE + ISOMERS – 3G               | 14       |
| 5.1.8    | 4-(TERT-BUTYL)PHENYL 12-METHYL-8-METHYLENE-3-(4-METHYLPENT-3-EN-1-YL)TRIDECA-3,11-DIENOATE + ISOMERS – 3H | 15       |

---

# 1 General procedures

All solvents, reagents and substrates were purchased from Acros, Sigma-Aldrich, Fisher-Scientific and TCI. All phosphorus ligands were purchased from ABCR. Pd(OAc)<sub>2</sub> and the other tested palladium precursors were donated by UMICORE AG & Co. KG. Solvents were purified *via* distillation and molecular sieves. For column chromatography technical quality solvents were used. Column chromatography was performed on Merck silica gel 60 (0.040 – 0.063 nm). NMR spectra were recorded on Bruker DRX400 (300-500 MHz) spectrometers with TMS as internal standard. CDCl<sub>3</sub> was used as solvent and purchased from DEUTERO. Chemical shifts are reported in parts per million as follows: chemical shift, multiplicity (s = singlet, d = doublet, t = triplet, q = quartet, m = multiplet, bs = broad singlet, dt = doublet of triplet), coupling constant, and integration. Gas chromatography was performed on a HP 6890 (Hewlett-Packard, Waldbronn, Germany) using a flame ionization detector at 325°C and a HP-5 column (30 m, diameter 0.32 mm, film thickness 25 μm) in connection with an auto sampler. The carrier gas was nitrogen (v = 1.2 mL/min, 30 cm/s). The injection volume was 1 μL and the split ratio 1:30. This HP 6890 (Hewlett-Packard, Waldbronn, Germany) was equipped with a 70 eV detection unit was used for LCMS. High resolution mass spectra were measured on a TSQ mass spectrometer from ThermoQuest coupled to an HPLC-System (HPLC column: Hypersyl GOLD, 50 mm × 1 mm, 1.9 μm) for HPLC-ESI-HRMS.

## 1.1 General procedure for the carboxytelomerisation of $\beta$ -myrcene with alcohols

The alcohol (1 eq.) was added to a mixture of Pd(OAc)<sub>2</sub> (1 mol%) and dicyclohexylphenyl phosphine as ligand (5 mol%) dissolved in fresh distilled  $\beta$ -myrcene (5 eq.) under argon in a stainless steel autoclave. Afterwards, the reactor was pressurised with 3 bar carbon monoxide and stirred for 6 h at 80 °C reaction temperature. After conduction of the experiments, the reactor was cooled down by an ice-bath, degassed, flashed with argon and the yields of the products were determined *via* GC-FID-analysis. For detailed characterisation, the products were isolated through column chromatography over silica with cyclohexane/ethyl acetate (100:1→5:1) as eluents and characterized by NMR- and MS-analysis.

## 2 DoE

### 2.1 Settings in the DoE

Ranges of the investigated parameters by MODDE® based on initial studies:

- T: 20-110 °C
- P: Pd-ratio: 1-10
- $\beta$ -myrcene:methanol-ratio: 1-20
- $p_{CO}$ : 1-50 bar
- palladium catalyst concentration cat: 0.1-2 mol%

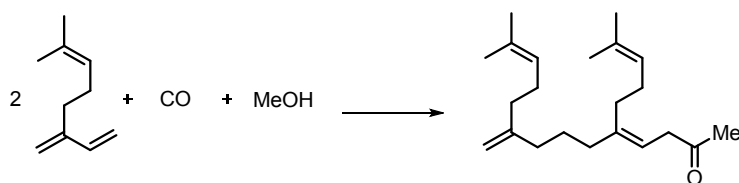

Scheme S1: Model substrates applied in the carboxytelomerisation in the design of experiments

Table S1: Setting in the DoE

| experiment | T [°C] | p [bar] | $\beta$ -myrcen/MeOH | cat [mol%] | P/Pd | $X_{MeOH}$ [%] | $Y_2$ [%] | $Y_3$ [%] |
|------------|--------|---------|----------------------|------------|------|----------------|-----------|-----------|
| 1          | 40     | 40      | 1                    | 0.1        | 1    | 0              | 0         | 0         |
| 2          | 110    | 10      | 10                   | 0.1        | 5    | 54             | 7         | 47        |
| 3          | 20     | 1       | 1                    | 0.1        | 10   | 0              | 0         | 0         |
| 4          | 110    | 50      | 1                    | 0.1        | 10   | 20             | 0         | 20        |
| 5          | 80     | 20      | 5                    | 0.1        | 10   | 88             | 0         | 88        |
| 6          | 20     | 50      | 20                   | 0.1        | 10   | 0              | 0         | 0         |
| 7          | 110    | 1       | 1                    | 0.5        | 1    | 80             | 6         | 74        |
| 8          | 20     | 50      | 5                    | 0.5        | 1    | 0              | 0         | 0         |
| 9          | 80     | 40      | 20                   | 0.5        | 5    | 88             | 0         | 88        |
| 10         | 40     | 15      | 20                   | 0.5        | 10   | 0              | 0         | 0         |
| 11         | 20     | 15      | 1                    | 1          | 2    | 0              | 0         | 0         |
| 12         | 80     | 50      | 1                    | 1          | 7    | 60             | 4         | 56        |
| 13         | 40     | 1       | 5                    | 1          | 7    | 0              | 0         | 0         |
| 14         | 110    | 40      | 10                   | 1          | 10   | 82             | 0         | 82        |
| 15         | 110    | 50      | 1                    | 1          | 2    | 90             | 30        | 60        |
| 16         | 80     | 1       | 10                   | 1          | 2    | 94             | 0         | 94        |
| 17         | 110    | 40      | 5                    | 2          | 5    | 80             | 0         | 80        |
| 18         | 110    | 15      | 20                   | 2          | 7    | 96             | 5         | 91        |
| 19         | 110    | 1       | 1                    | 2          | 10   | 80             | 10        | 70        |
| 20         | 80     | 50      | 20                   | 2          | 10   | 90             | 0         | 90        |
| 21         | 60     | 5       | 1                    | 1          | 2    | 30             | 0         | 30        |
| 22         | 60     | 5       | 1                    | 1          | 2    | 33             | 0         | 33        |
| 23         | 40     | 40      | 1                    | 0.1        | 1    | 0              | 0         | 0         |

|    |     |    |    |     |    |    |    |    |
|----|-----|----|----|-----|----|----|----|----|
| 24 | 110 | 10 | 10 | 0.1 | 5  | 46 | 4  | 42 |
| 25 | 20  | 1  | 1  | 0.1 | 10 | 0  | 0  | 0  |
| 26 | 110 | 50 | 1  | 0.1 | 10 | 25 | 0  | 25 |
| 27 | 80  | 20 | 5  | 0.1 | 10 | 85 | 0  | 85 |
| 28 | 20  | 50 | 20 | 0.1 | 10 | 0  | 0  | 0  |
| 29 | 110 | 1  | 1  | 0.5 | 1  | 78 | 5  | 73 |
| 30 | 20  | 50 | 5  | 0.1 | 5  | 0  | 0  | 0  |
| 31 | 80  | 40 | 20 | 0.5 | 5  | 75 | 0  | 75 |
| 32 | 40  | 15 | 20 | 0.5 | 10 | 0  | 0  | 0  |
| 33 | 20  | 15 | 1  | 1   | 1  | 0  | 0  | 0  |
| 34 | 80  | 50 | 1  | 1   | 7  | 60 | 8  | 52 |
| 35 | 40  | 1  | 5  | 1   | 7  | 0  | 0  | 0  |
| 36 | 110 | 40 | 10 | 1   | 10 | 84 | 0  | 84 |
| 37 | 110 | 50 | 2  | 2   | 1  | 78 | 20 | 58 |
| 38 | 80  | 1  | 10 | 2   | 1  | 94 | 0  | 94 |
| 39 | 110 | 40 | 5  | 2   | 5  | 88 | 10 | 78 |
| 40 | 110 | 15 | 20 | 2   | 7  | 96 | 5  | 91 |
| 41 | 110 | 1  | 2  | 2   | 10 | 79 | 11 | 68 |
| 42 | 80  | 50 | 20 | 2   | 10 | 85 | 0  | 85 |
| 43 | 60  | 10 | 2  | 0.5 | 7  | 32 | 0  | 32 |
| 44 | 60  | 10 | 2  | 0.5 | 7  | 36 | 0  | 36 |

Conditions: 3.7 mmol  $\beta$ -myrcene, Pd(OAc)<sub>2</sub>, ligand = PCy<sub>2</sub>Ph,  $t = 6$  h, 500 rpm.

## 2.2 Results of the DoE

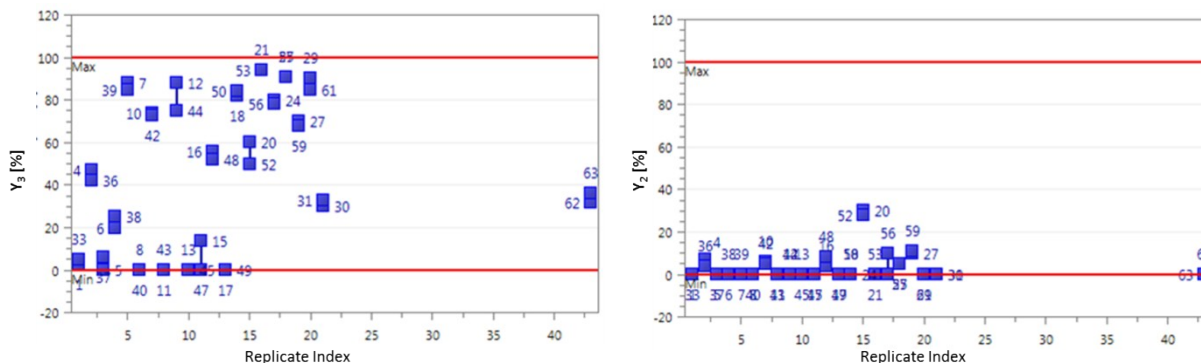

Figure S1: Results of the DoE

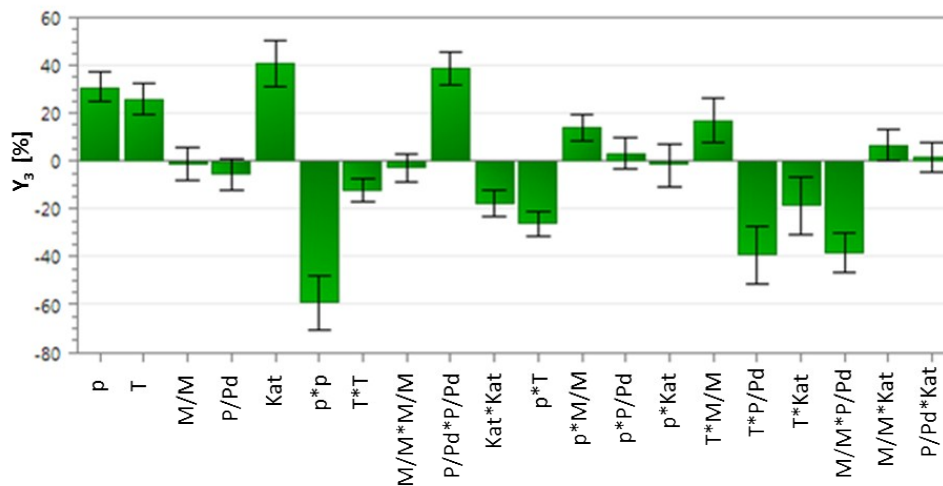

Figure S2. Sensitive plot of each parameter in case of the desired  $C_{21}$ -ester **3** formation

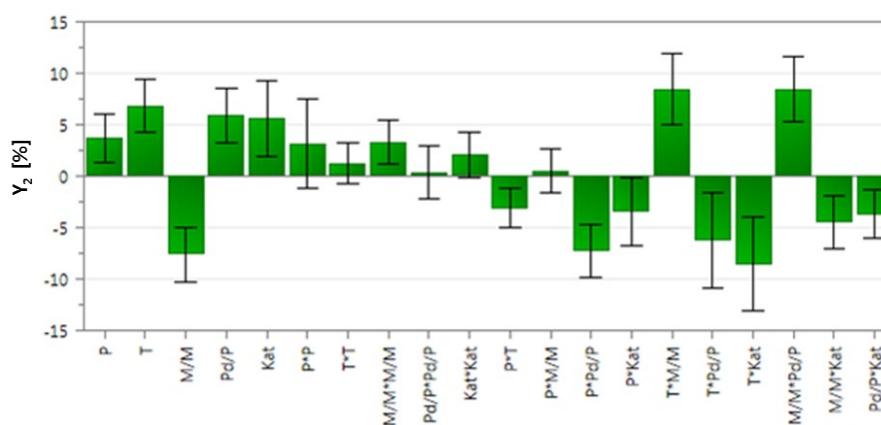

Figure S3. Sensitive plot of each parameter in case of the  $C_{11}$ -ester **2** formation

### 3 Applied 1,3-dienes

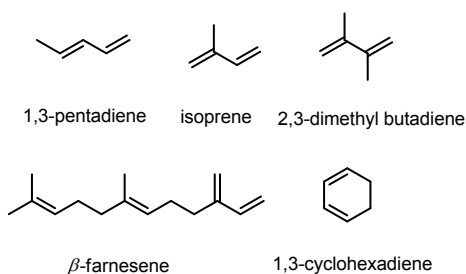

Figure S4: Applied 1,3-dienes under optimised carboxytelomerisation conditions without any formation of the target products; conditions: 7.3 mmol 1,3-diene, 1.5 mmol MeOH, 1 mol% Pd(OAc)<sub>2</sub>, 5 mol% Cy<sub>2</sub>Ph, 80 °C, 3 bar CO, 6 h, 500 rpm

---

## 4 Characterisation data of products

### 4.1.1 Methyl 4,8-dimethylnona-3,7-dienoate + isomers - 2a

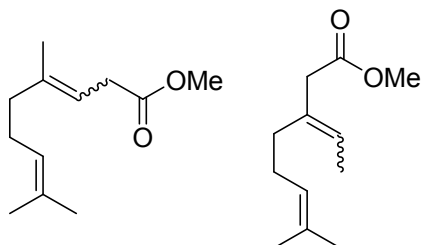

**<sup>1</sup>H-NMR:** (CDCl<sub>3</sub>, 600 MHz), δ 1.59 (s, 3H), 1.63 (s, 3H), 1.67 (s, 3H, isomer), 1.74 (s, 3H, isomer), 2.04 (m, 4H), 3.05 (d, 2H, isomer), 3.67 (s, 3H), 5.08 (m, 1H), 5.32 (m, 1H).

**<sup>13</sup>C-NMR:** (CDCl<sub>3</sub>, 150 MHz), δ 16.47, 17.81, 25.82, 26.44, 30.07, 33.53, 39.69, 42.66, 51.83, 115.78, 124.13, 131.74, 139.20, 173.03

**HR-MS:** C<sub>12</sub>H<sub>21</sub>O<sub>2</sub> [M+H]<sup>+</sup> calculated: 197.15361; measured: 197.15361

### 4.1.2 Methyl 12-methyl-8-methylene-3-(4-methylpent-3-en-1-yl)trideca-3,11-dienoate + isomers - 3a

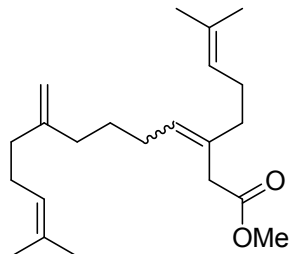

**<sup>1</sup>H-NMR:** (CDCl<sub>3</sub>, 600 MHz), δ 1.59 (s, 3H), 1.61 (s, 3H, isomer), 1.62 (s, 3H, isomer), 1.68 (s, 3H, isomer), 2.04 (m, 4H), 2.09 (m, 4H, isomer), 3.00 (m, 2H, tail-head/tail-tail-isomers), 3.67 (s, 3H), 3.68 (s, 3H, isomer), 4.73 (s, 1H), 4.99 (m, 2H), 5.11 (m, 2H), 5.34 (m, 1H, isomer), 5.51 (m, 1H)

**<sup>13</sup>C-NMR:** (CDCl<sub>3</sub>, 150 MHz), δ 16.3, 17.5, 17.6, 26.3, 26.9, 33.4, 37.5, 39.5, 42.5, 51.7, 115.6, 116.3, 123.8, 124.0, 131.6, 131.9, 133.0, 139.1, 139.6, 172.8

**HR-MS:** C<sub>22</sub>H<sub>37</sub>O<sub>2</sub> [M+H]<sup>+</sup> calculated: 333.27881; measured: 333.27893

---

#### 4.1.3 Ethyl 12-methyl-8-methylene-3-(4-methylpent-3-en-1-yl)trideca-3,11-dienoate + isomers - 3b

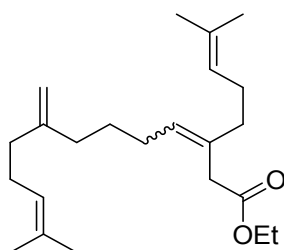

**<sup>1</sup>H-NMR:** (CDCl<sub>3</sub>), 400 MHz), δ 1.26 (t, 3 H), 1.5 (m, 2H), 1.56 (s, 3H), 1.62 (s, 3H), 1.69 (s, 2H), 2.08 (m, 4H), 3.00 (s, 2H), 4.15 (q, 2H), 4.50 (s, 1H), 4.73 (s, 1H), 5.12 (m, 2H), 5.31 (m, 1H)

**GC-MS** (EI, 70 eV): m/z [%] = 346.20 (1.37), 303.20 (0.87), 258.20 (1.64), 215.2 (1.86), 189.20 (7.97), 161.2 (6.37), 135.1 (5.47), 107.1 (17.44), 69.10 (100)

#### 4.1.4 Butyl 12-methyl-8-methylene-3-(4-methylpent-3-en-1-yl)trideca-3,11-dienoate + isomers - 3c

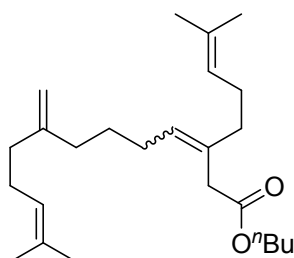

**<sup>1</sup>H-NMR:** (CDCl<sub>3</sub>), 500 MHz), δ 0.93 (t, 3H), 1.37 (m, 2H), 1.49 (m, 4H), 1.62 (s, 6H), 1.69 (s, 6H), 2.04 (m, 10H), 3.00 (s, 2H), 3.05 (t, 1H, isomer), 4.07 (q, 2H), 4.72 (s, 1H, isomer), 4.91 (s, 1H), 4.97 (s, 1H), 5.12 (m, 2H), 5.30 (m, 1H)

**HR-MS:** C<sub>25</sub>H<sub>43</sub>O<sub>2</sub> [M+H]<sup>+</sup> calculated: 375.32576; measured: 375.32621



---

**4.1.5 Decyl 12-methyl-8-methylene-3-(4-methylpent-3-en-1-yl)trideca-3,11-dienoate + isomers - 3d**

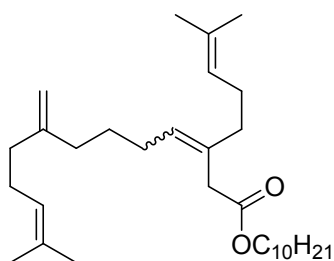

**GC-MS** (EI, 70 eV):  $m/z$  [%] = 458.46 (2.07), 389.370 (1.6), 258.26 (2.83), 215.19 (2.91), 189.18 (11.33), 107.1 (12.64), 69.1 (100)

**4.1.6 Isopropyl 12-methyl-8-methylene-3-(4-methylpent-3-en-1-yl)trideca-3,11-dienoate + isomers - 3e**

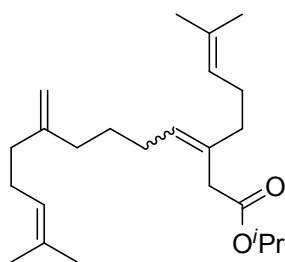

**<sup>1</sup>H-NMR**: (CDCl<sub>3</sub>), 500 MHz),  $\delta$  1.24 (m, 2H), 1.34 (s, 3H, Isomer), 1.44 (s, 3H, Isomer), 1.50 (m, 2H), 1.56 (s, 2H), 1.69 (s, 2H), 2.06 (m, 10H), 2.97 (s, 2H, Isomer), 3.02 (t, 1H), 4.50 (s, 1H), 4.73 (s, 1H), 5.00 (m, 2H), 5.11 (s, 3H), 5.30 (m, 1H)

**GC-MS** (EI, 70 eV):  $m/z$  [%] = 360.4 (1.61), 317.10 (1.82), 275.1 (1.78), 249.10 (2.38), 215.10 (1.77), 189.20 (8.08), 135.00 (10.34), 107.10 (15.96), 69.1 (100)

---

**4.1.7 Benzyl 12-methyl-8-methylene-3-(4-methylpent-3-en-1-yl)trideca-3,11-dienoate + isomers - 3g**

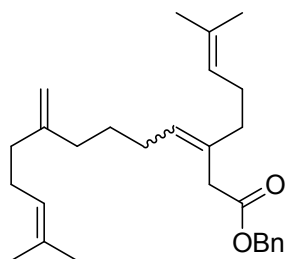

**<sup>1</sup>H-NMR:** (CDCl<sub>3</sub>), 400 MHz), δ 1.27 (m, 2H), 1.49 (m, 2H, isomer), 1.62 (s, 1H), 1.70 (s, 1H) 2.05 (m, 10H), 3.07 (s, 2H), 3.11 (t, 1H), 4.72 (s, 2H), 5.13 (s, 2H), 5.34 (m, 1H), 7.35 (s, 5H)

**HR-MS:** C<sub>28</sub>H<sub>41</sub>O<sub>2</sub> [M+H]<sup>+</sup> calculated: 409.31011; measured: 409.31023

**4.1.8 4-(tert-butyl)phenyl 12-methyl-8-methylene-3-(4-methylpent-3-en-1-yl)trideca-3,11-dienoate + isomers - 3h**

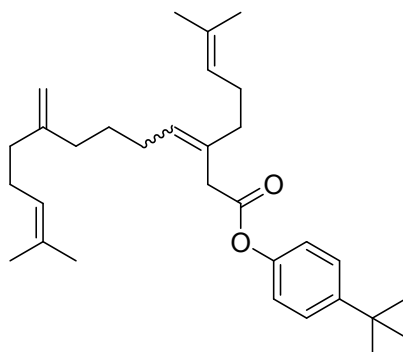

GC-MS (EI, 70 eV): m/z [%] = 450.5 (0.94), 301.34 (5.69), 257.28 (2.55) 215.21 (3.05), 189.19 (4.76), 163.17 (6.99), 150.2 (23.4), 135.10 (100), 121.1 (12.84), 107.1 (27.52), 69.1 (89.51)

## 5 NMR-spectra

### 5.1.1 Methyl 4,8-dimethylnona-3,7-dienoate + isomers - 2a

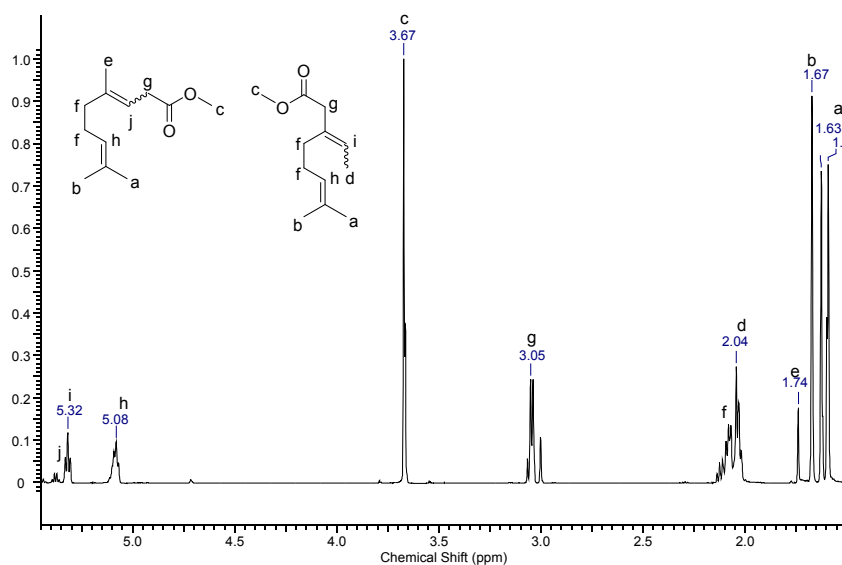

Figure S5: <sup>1</sup>H-NMR spectrum in d-CDCl<sub>3</sub> of methyl 4,8-dimethylnona-3,7-dienoate - 2a

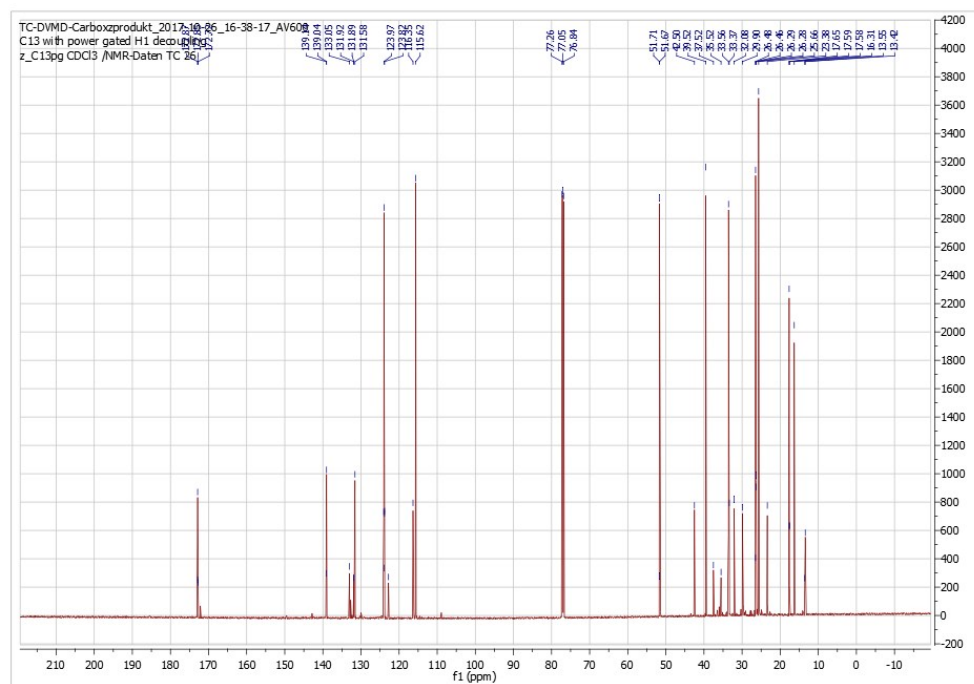

## 5.1.2 Methyl 12-methyl-8-methylene-3-(4-methylpent-3-en-1-yl)trideca-3,11-dienoate + isomers - 3a

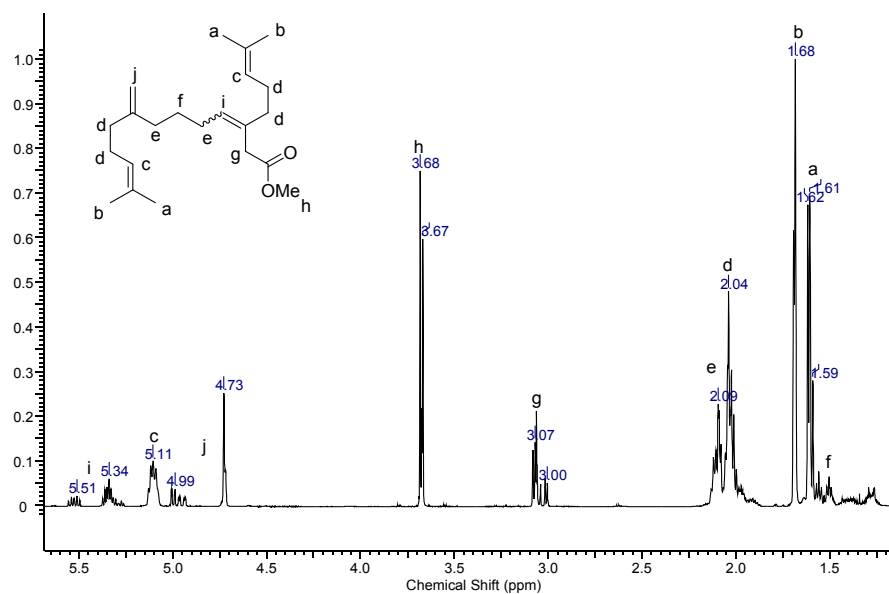

Figure S7: <sup>1</sup>H-NMR spectrum in d-CDCl<sub>3</sub> of Methyl 12-methyl-8-methylene-3-(4-methylpent-3-en-1-yl)trideca-3,11-dienoate - 3a

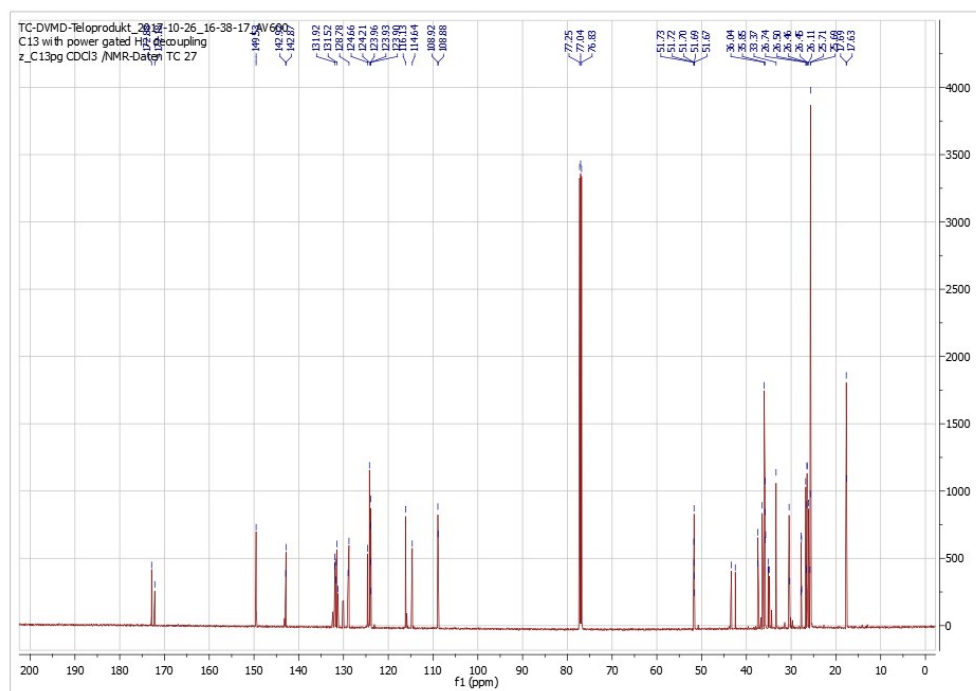

Figure S8: <sup>13</sup>C-NMR spectrum in d-CDCl<sub>3</sub> of Methyl 12-methyl-8-methylene-3-(4-methylpent-3-en-1-yl)trideca-3,11-dienoate - 3a

### 5.1.3 Ethyl 12-methyl-8-methylene-3-(4-methylpent-3-en-1-yl)trideca-3,11-dienoate + isomers – 3b

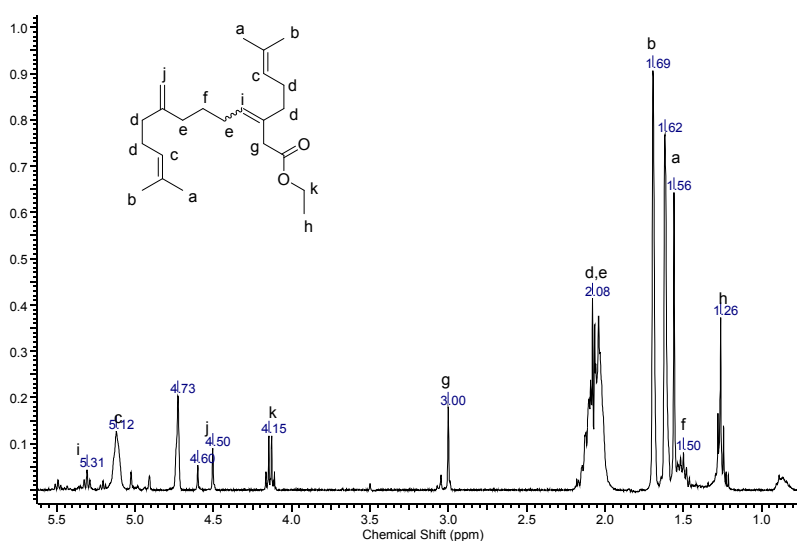

Figure S9: <sup>1</sup>H-NMR spectrum in d-CDCl<sub>3</sub> of Ethyl 12-methyl-8-methylene-3-(4-methylpent-3-en-1-yl)trideca-3,11-dienoate + isomers – 3b

### 5.1.4 Butyl 12-methyl-8-methylene-3-(4-methylpent-3-en-1-yl)trideca-3,11-dienoate + isomers – 3c

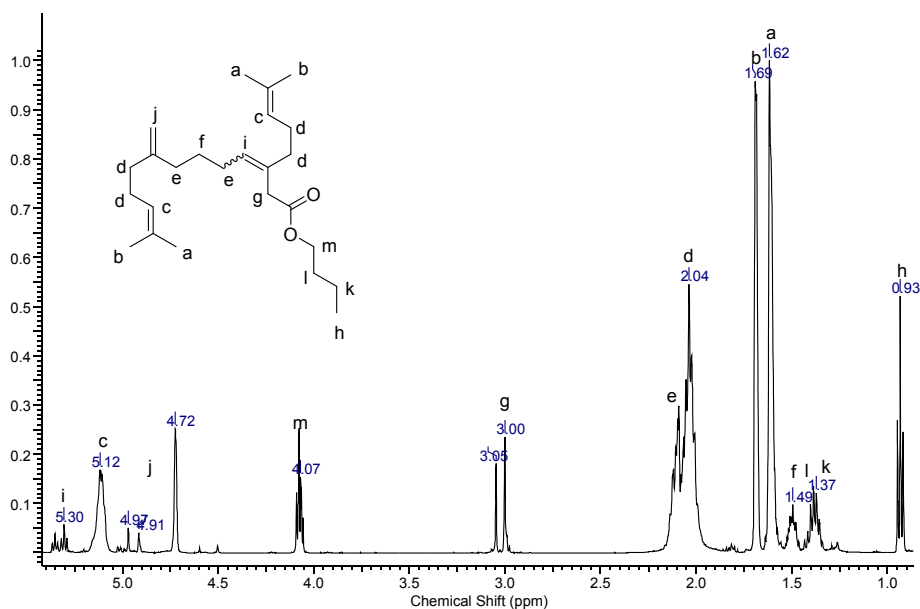

Figure S10: <sup>1</sup>H-NMR spectrum in d-CDCl<sub>3</sub> of Butyl 12-methyl-8-methylene-3-(4-methylpent-3-en-1-yl)trideca-3,11-dienoate + isomers – 3c



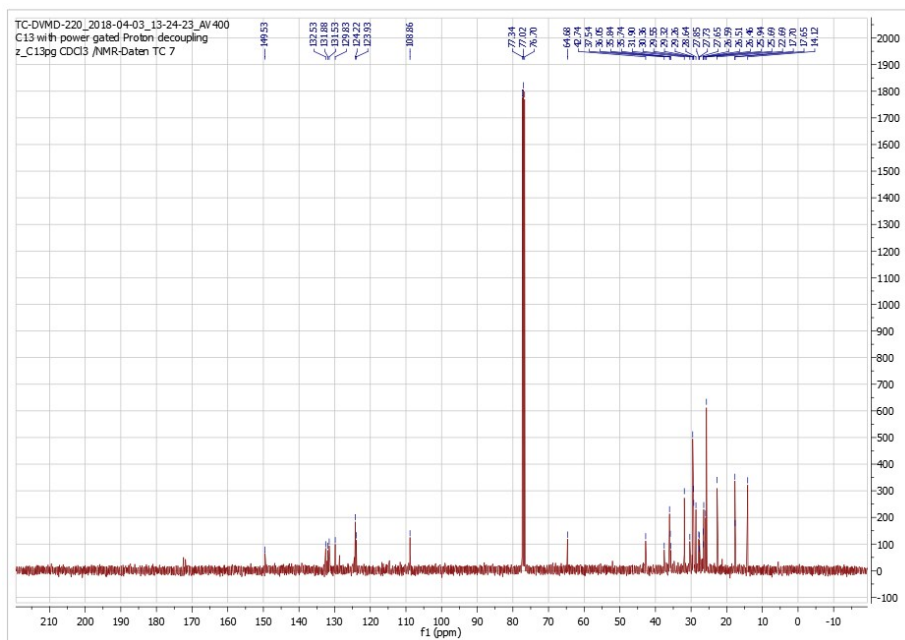

Figure S13:  $^{13}\text{C}$ -NMR spectrum in  $d\text{-CDCl}_3$  of Decyl 12-methyl-8-methylene-3-(4-methylpent-3-en-1-yl)trideca-3,11-dienoate + isomers – **3d**

### 5.1.6 Isopropyl 12-methyl-8-methylene-3-(4-methylpent-3-en-1-yl)trideca-3,11-dienoate + isomers – **3e**

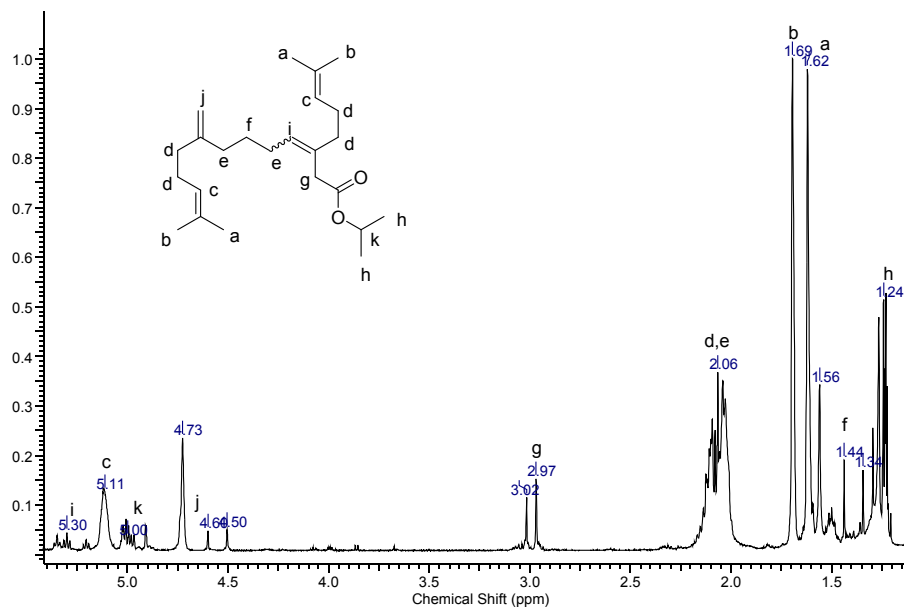

Figure S14:  $^1\text{H}$ -NMR spectrum in  $d\text{-CDCl}_3$  of Isopropyl 12-methyl-8-methylene-3-(4-methylpent-3-en-1-yl)trideca-3,11-dienoate + isomers – **3e**

### 5.1.7 Benzyl 12-methyl-8-methylene-3-(4-methylpent-3-en-1-yl)trideca-3,11-dienoate + isomers – 3g

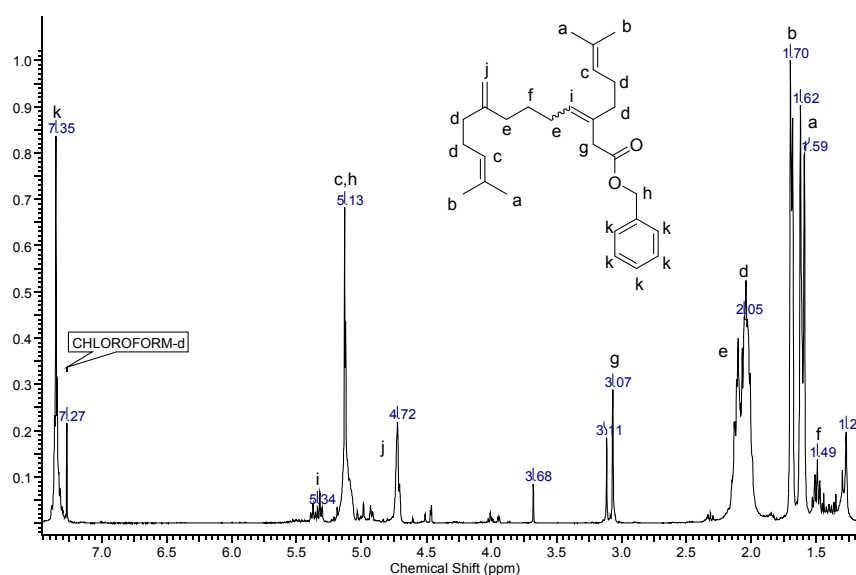

Figure S15: <sup>1</sup>H-NMR spectrum in d-CDCl<sub>3</sub> of Benzyl 12-methyl-8-methylene-3-(4-methylpent-3-en-1-yl)trideca-3,11-dienoate + isomers – 3g

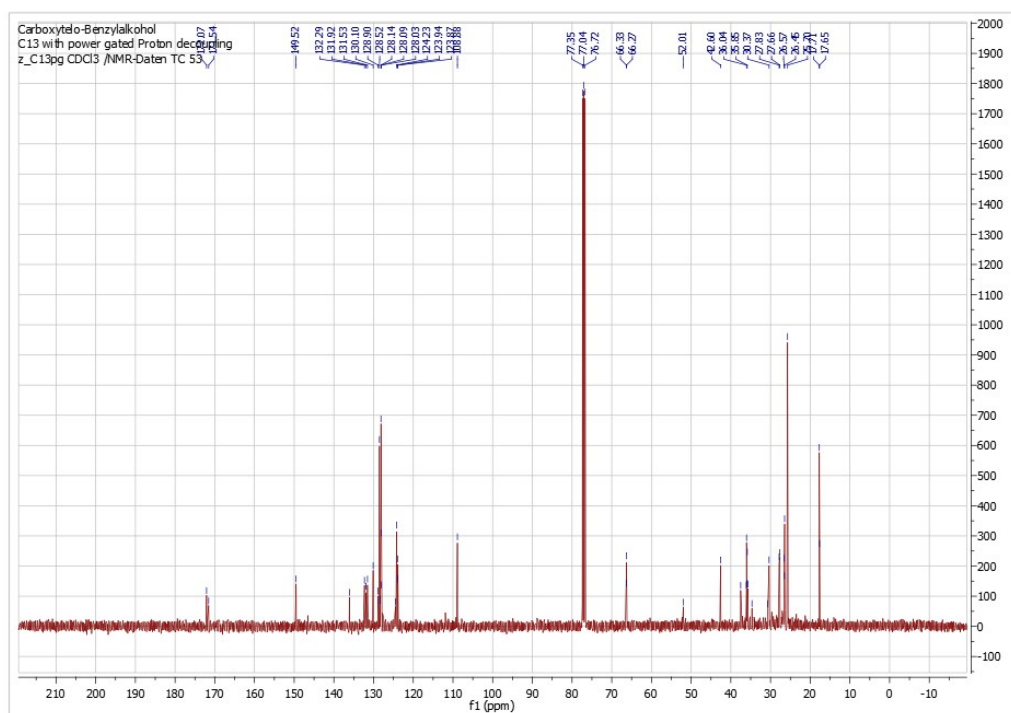

Figure S16: <sup>13</sup>C-NMR spectrum in d-CDCl<sub>3</sub> of Benzyl 12-methyl-8-methylene-3-(4-methylpent-3-en-1-yl)trideca-3,11-dienoate + isomers – 3g



---

### 5.1.8 4-(tert-butyl)phenyl 12-methyl-8-methylene-3-(4-methylpent-3-en-1-yl)trideca-3,11-dienoate + isomers - 3h

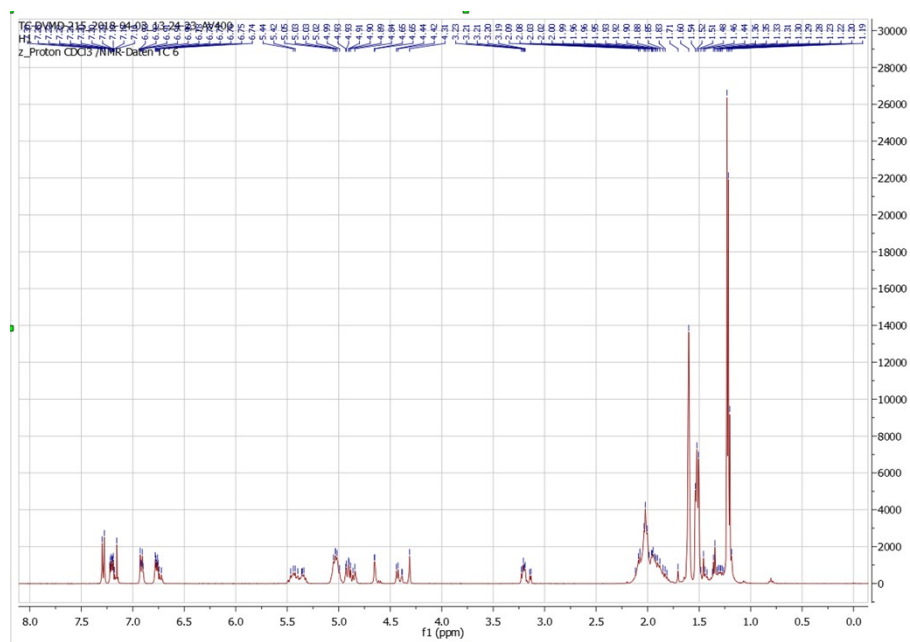

Figure S17:  $^1\text{H}$ -NMR spectrum in  $d\text{-CDCl}_3$  of 4-(tert-butyl)phenyl 12-methyl-8-methylene-3-(4-methylpent-3-en-1-yl)trideca-3,11-dienoate + isomers - **3h**

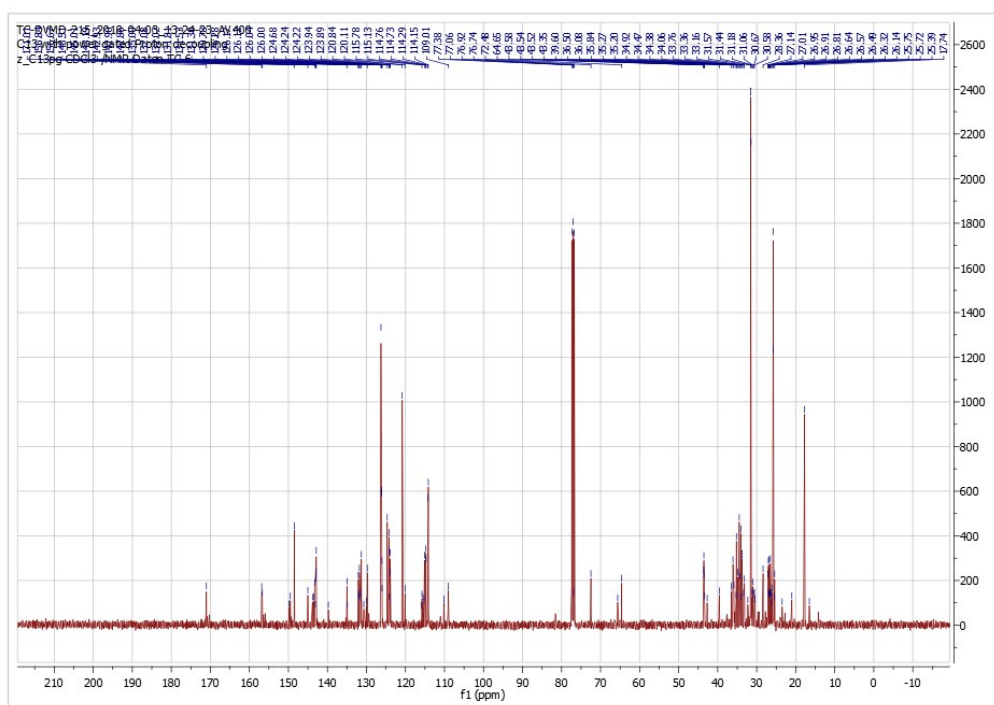

Figure S18:  $^{13}\text{C}$ -NMR spectrum in  $d\text{-CDCl}_3$  of 4-(tert-butyl)phenyl 12-methyl-8-methylene-3-(4-methylpent-3-en-1-yl)trideca-3,11-dienoate + isomers - **3h**

---
